# Supplementary material
Source: PubMed Central journal article supplement (PMC2746941)
Supplement: halms390633-supplement_1.pdf [file halms390633-supplement_1.pdf]

**Table 2a** – Standardized hazard ratios for mortality associated with a one standard deviation increase in diastolic blood pressure (*web-based version only*)

|                       | Diastolic blood pressure                |                                       | p-value for sex interaction |
|-----------------------|-----------------------------------------|---------------------------------------|-----------------------------|
|                       | HR <sup>*</sup> (95% CI), p-value WOMEN | HR <sup>*</sup> (95% CI), p-value MEN |                             |
| All cause mortality   | 1.23 (1.12-1.35), <0.001                | 1.17 (1.09-1.25), <0.001              | 0.59                        |
| CVD mortality         | 1.33 (1.16-1.52), <0.001                | 1.36 (1.25-1.48), <0.001              | 0.45                        |
| CHD mortality         | 1.19 (0.96-1.47), 0.11                  | 1.33 (1.20-1.48), <0.001              | 0.23                        |
| Stroke mortality      | 1.57 (1.26-1.95), <0.001                | 1.57 (1.31-1.89), <0.001              | 0.81                        |
| Cancer mortality      | 1.04 (0.85-1.26), 0.70                  | 0.94 (0.81-1.09), 0.40                | 0.40                        |
| Respiratory mortality | 1.15 (0.87-1.52), 0.33                  | 0.87 (0.70-1.08), 0.20                | 0.16                        |

\* Hazard ratio associated with a 1 SD increase in diastolic BP (14.9 mmHg women; 14.4 mmHg men)
